# Supplementary material for: Facile preparation of a multifunctional fluorescent nanosensor for chemical and biological applications
Source: Royal Society of Chemistry journal article supplement (doi:10.1039/c2jm33103a), 2012-01-01
Supplement: c2jm33103a.pdf [file c2jm33103a.pdf]

## Supplementary Information

### **Facile preparation of a multifunctional fluorescent nanosensor for chemical and biological applications**

**Jing Wang<sup>a,d,§</sup>, Wanping Guo<sup>a,§</sup>, Jae-Ho Bae<sup>b</sup>, Sun-Hee Kim<sup>b</sup>, Jiale Song<sup>c</sup>, and Chang-Sik Ha<sup>\*a</sup>**

<sup>a</sup>Pioneer Research Center for Nanogrid Materials, Department of Polymer Science and Engineering, Pusan National University, Busan 609-735, South Korea

<sup>b</sup>Department of Biochemistry, School of Medicine, Pusan National University, Yangsan 626-870, South Korea

<sup>c</sup>Department of Food Science and Nutrition, Pusan National University, Busan 609-735, South Korea

<sup>d</sup>College of Environmental Science and Engineering, Guilin University of Technology, 12, Jiangan Road, Guilin 541004, Guangxi, People's Republic of China

<sup>§</sup>These authors contributed equally to this work.

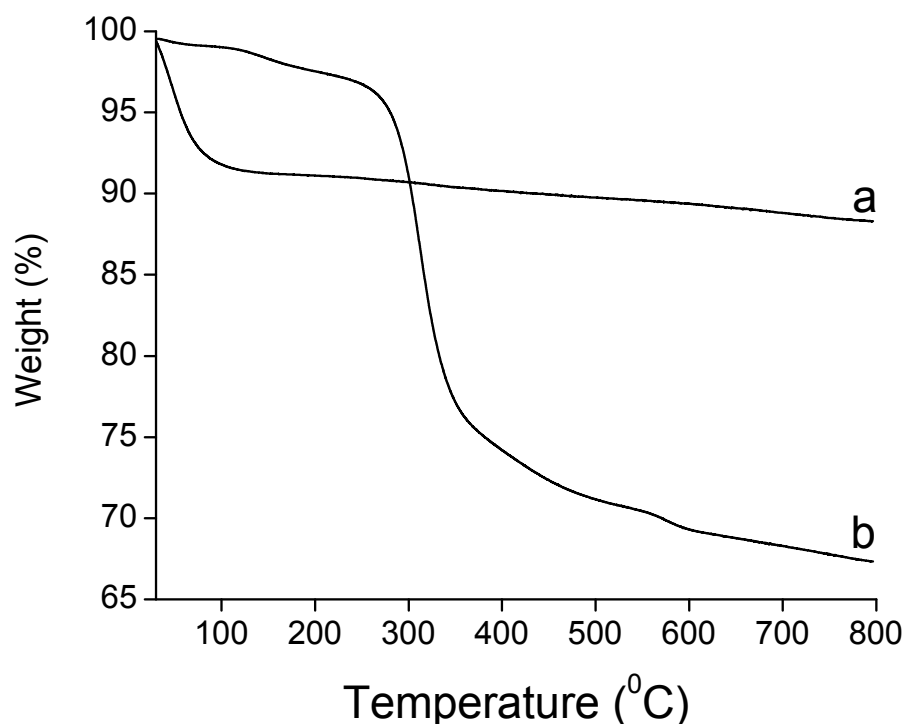

**Fig. S1** TGA curves of (a) solvent-extracted SBA-15 and (b) functionalized SBA-15 samples. The amount of functional group in SBA-15 is estimated to be  $0.78 \text{ mmol g}^{-1}$ . Note: CHNS element analysis data of functionalized SBA-15 (sample **1**) are as follows: C: 20.4 wt%, H: 2.59 wt%, N: 4.23 wt%, S: 2.64 wt%. Thus the atomic ratio is calculated to be C : H : N : S = 20.6 : 31.4 : 3.7 : 1.0, which is in good agreement with the molar composition of organic part of **1**:  $\text{C}_{21}\text{H}_{31}\text{N}_4\text{SO}_3$  (MW: 419 g/mol). According to TGA curve b, the amount of organic part (functional group,  $\text{C}_{21}\text{H}_{31}\text{N}_4\text{SO}_3$ ) of **1** is 32.6 wt%. Therefore the moles of organic groups per gram of SBA-15 is calculated to  $32.6 \text{ \%}/419 = 0.78 \text{ mmol}$ . Namely, the amount of functional group in SBA-15 is  $0.78 \text{ mmol g}^{-1}$ .

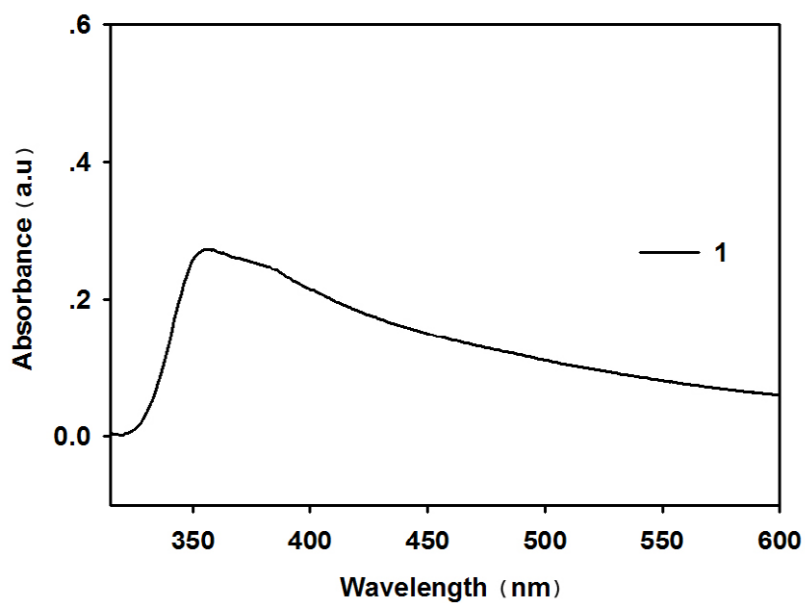

**Fig. S2** Absorption spectrum of **1** ( $0.02 \text{ g L}^{-1}$ ) suspended in aqueous solution.

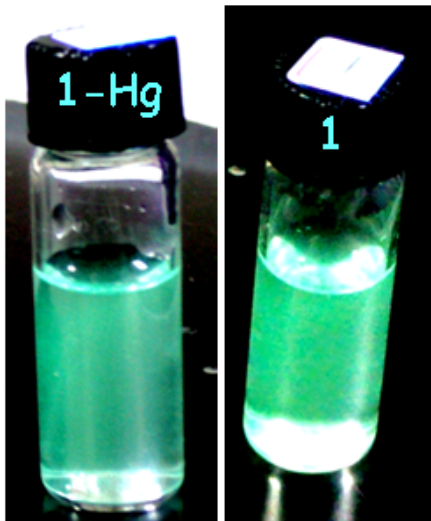

**Fig. S3** Photographs of **1** ( $0.025 \text{ g L}^{-1}$ , pH 6.5) in the presence and absence of  $\text{Hg}^{2+}$  ( $5 \times 10^{-5} \text{ M}$ ) under illumination with 365 nm light.

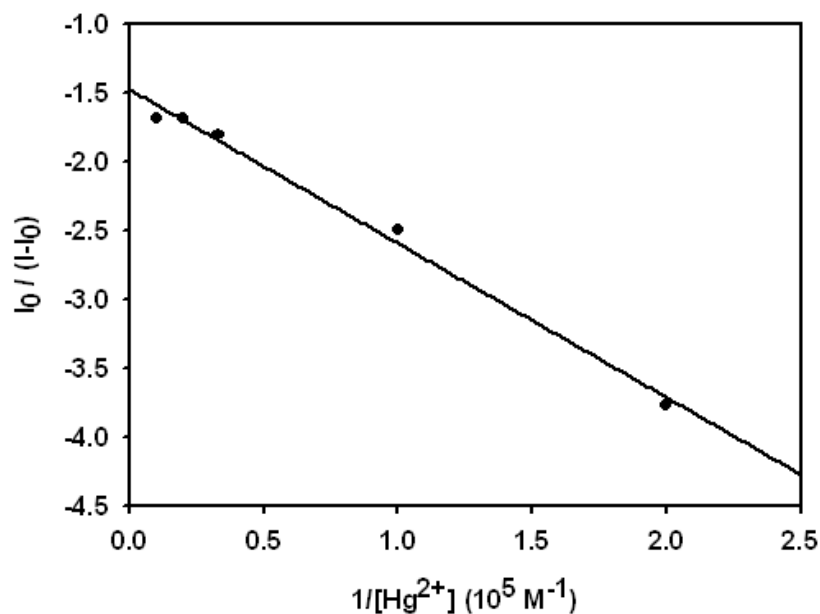

**Fig. S4** The plot of  $I_0/(I-I_0)$  versus  $1/[Hg^{2+}]$ .  $I$  and  $I_0$  are the fluorescence intensity of **1** at 510 nm in the presence and absence of different amounts of  $Hg^{2+}$  ions, respectively.

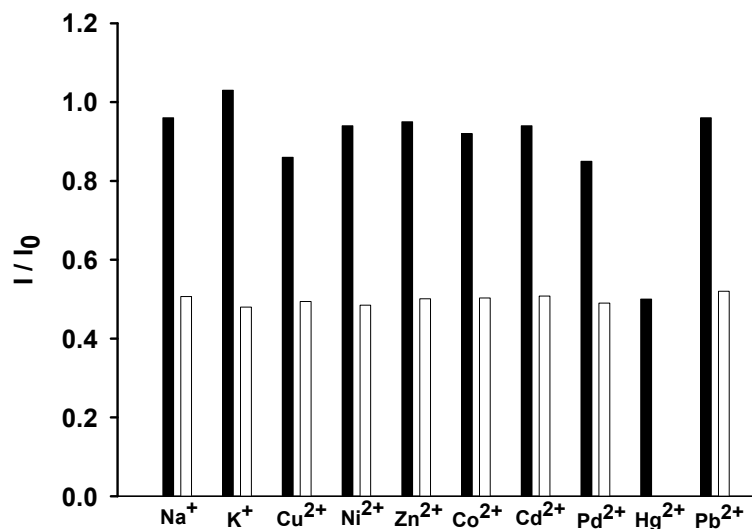

**Fig. S5** Fluorescence response of **1** ( $0.02 \text{ g L}^{-1}$ ) toward various metal cations (all as chlorides) in aqueous suspensions.  $I$  and  $I_0$  are the fluorescence intensity of **1** at 510 nm in the presence and absence of metal cations, respectively. Black bars: each cation ( $5 \times 10^{-5} \text{ M}$ ) was added. White bars: each cation ( $5 \times 10^{-4} \text{ M}$ ) and  $Hg^{2+}$  ion ( $5 \times 10^{-5} \text{ M}$ ) were added.

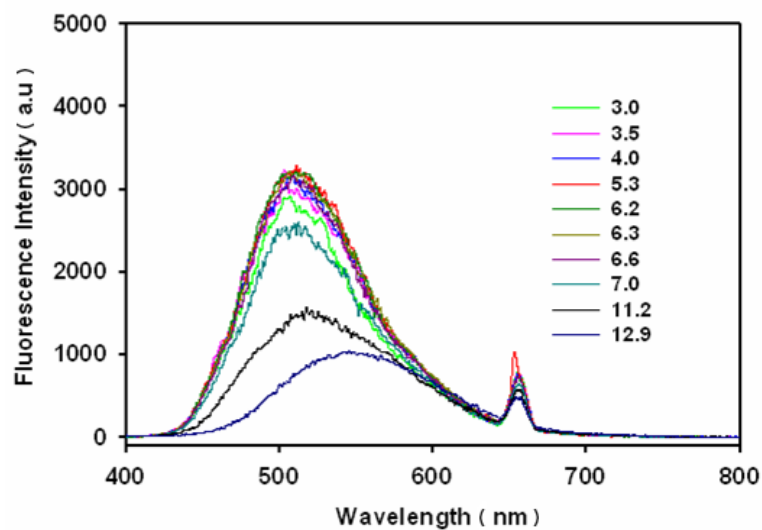

**Fig. S6** Fluorescence emission spectra of **1** ( $0.015 \text{ g L}^{-1}$ ) at different pH values in aqueous suspensions.

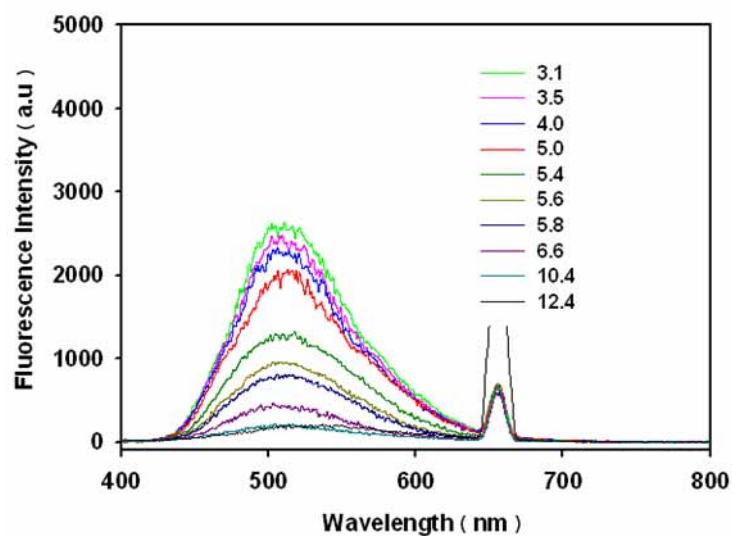

**Fig. S7** Fluorescence emission spectra of **1** ( $0.015 \text{ g L}^{-1}$ ) in the presence of  $\text{Hg}^{2+}$  ( $5 \times 10^{-5} \text{ M}$ ) at different pH values in aqueous suspensions.

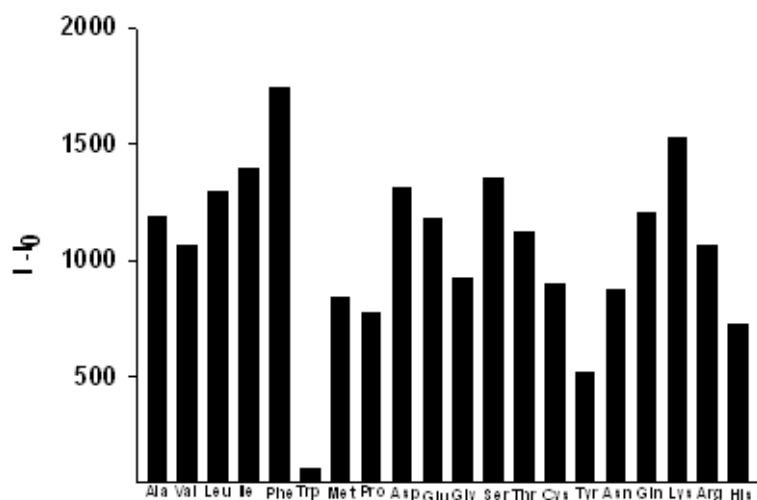

**Fig. S8** Fluorescence emission intensity change of 1/Hg<sup>2+</sup> (0.02 g L<sup>-1</sup>, 5×10<sup>-5</sup> M, pH 6.5) in the presence of various amino acids in aqueous suspensions.

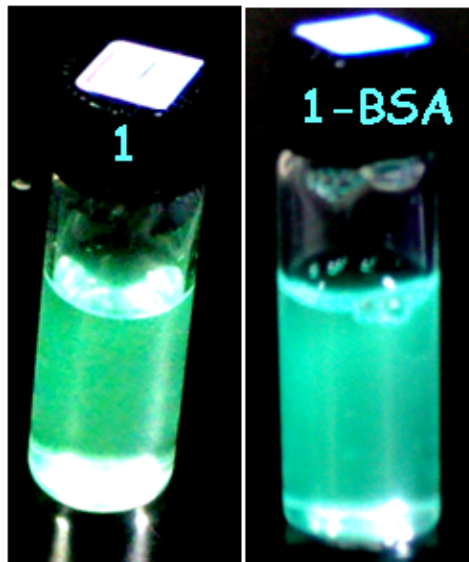

**Fig. S9** Photographs of 1 (0.025 g L<sup>-1</sup>, pH 6.5) in the absence and presence of BSA (2.5×10<sup>-6</sup> M) under illumination with 365 nm light.

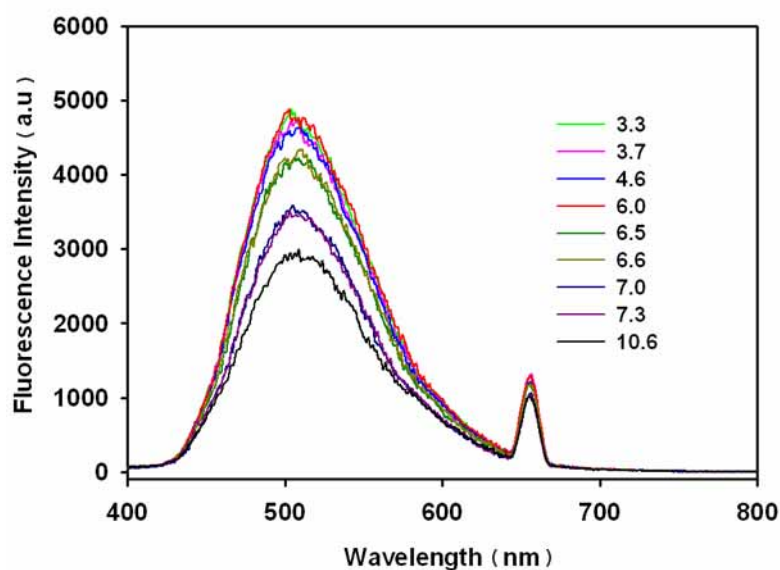

**Fig. S10** Fluorescence emission spectra of **1** ( $0.015 \text{ g L}^{-1}$ ) in the presence of BSA ( $2.5 \times 10^{-6} \text{ M}$ ) at different pH values in aqueous suspensions.

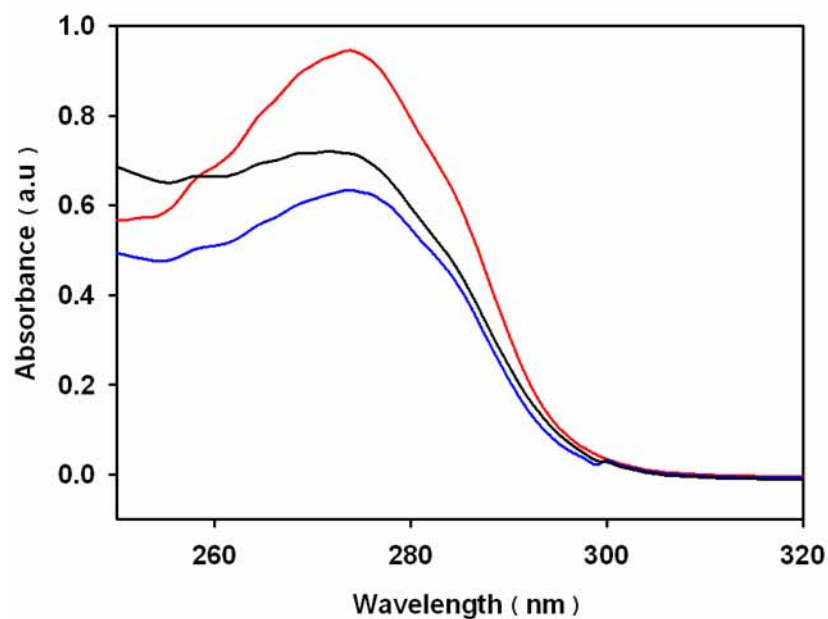

**Fig. S11** Absorption spectra of BSA before and after adsorption by **1** and **2**. BSA solution before adsorption (red line), adsorbed by **1** (black line), adsorbed by **2** (blue line).  $876 \text{ mg g}^{-1}$  of BSA was adsorbed by **1**,  $1185 \text{ mg g}^{-1}$  of BSA was adsorbed by **2**.
